# Supplementary material
Source: MDPI journal article supplement (https://www.mdpi.com/2227-7102/7/1/18)
Supplement: s1 [file s1]

## Sheet: Sheet1
Year	Semester	Day	Rep	Question	PreScore	PostScore	RateofImprovement
2011	F	M	1	1	2	4	100					Q#	Fall	Spring		Fall SE	Spring SE
2011	F	M	1	2	2	4	100					1	65.24	65.97		7.1	8.8
2011	F	M	1	3	1	4	300					2	138.68	143.98		10.4	13.9
2011	F	M	1	4	2	4	100					3	114.36	113.51		10.5	8.3
2011	F	M	1	5	2	4	100					4	128.94	117.56		12.4	11
2011	F	M	1	6	1	5	400					5	182.71	179.16		14.8	13.9
2011	F	M	1	7	1	5	400					6	195	189.18		14	13.2
2011	F	M	1	8	1	5	400					7	206.22	193.46		12.6	18
2011	F	M	1	9	1	4	300					8	186.14	186.48		13.6	18.4
2011	F	M	1	10	1	4	300					9	184.91	175.9		13.1	16.8
2011	F	M	2	1	3	4	33.3333					10	187	177.92		12.9	14.1
2011	F	M	2	2	3	4	33.3333
2011	F	M	2	3	4	5	25						N=95	N=44
2011	F	M	2	4	3	4	33.3333
2011	F	M	2	5	2	3	50
2011	F	M	2	6	2	3	50
2011	F	M	2	7	2	3	50
2011	F	M	2	8	2	3	50
2011	F	M	2	9	3	4	33.3333
2011	F	M	2	10	2	3	50
2011	F	M	3	1	2	5	150
2011	F	M	3	2	3	4	33.3333
2011	F	M	3	3	3	4	33.3333
2011	F	M	3	4	2	3	50
2011	F	M	3	5	4	5	25
2011	F	M	3	6	2	3	50
2011	F	M	3	7	3	4	33.3333
2011	F	M	3	8	2	3	50
2011	F	M	3	9	3	4	33.3333
2011	F	M	3	10	2	4	100
2011	F	M	4	1	3	4	33.3333
2011	F	M	4	2	2	4	100
2011	F	M	4	3	3	5	66.6667
2011	F	M	4	4	2	5	150
2011	F	M	4	5	2	5	150
2011	F	M	4	6	2	4	100
2011	F	M	4	7	1	4	300
2011	F	M	4	8	1	4	300
2011	F	M	4	9	1	4	300
2011	F	M	4	10	1	4	300
2011	F	M	5	1	2	5	150
2011	F	M	5	2	2	3	50
2011	F	M	5	3	3	4	33.3333
2011	F	M	5	4	3	4	33.3333
2011	F	M	5	5	3	5	66.6667
2011	F	M	5	6	1	5	400
2011	F	M	5	7	1	5	400
2011	F	M	5	8	2	5	150
2011	F	M	5	9	2	5	150
2011	F	M	5	10	2	5	150
2011	F	M	6	1	3	4	33.3333
2011	F	M	6	2	2	3	50
2011	F	M	6	3	3	5	66.6667
2011	F	M	6	4	3	5	66.6667
2011	F	M	6	5	2	3	50
2011	F	M	6	6	2	4	100
2011	F	M	6	7	3	4	33.3333
2011	F	M	6	8	2	3	50
2011	F	M	6	9	3	5	66.6667
2011	F	M	6	10	3	4	33.3333
2011	F	M	7	1	2	3	50
2011	F	M	7	2	2	4	100
2011	F	M	7	3	4	5	25
2011	F	M	7	4	5	5	0
2011	F	M	7	5	3	5	66.6667
2011	F	M	7	6	1	5	400
2011	F	M	7	7	1	5	400
2011	F	M	7	8	1	4	300
2011	F	M	7	9	1	4	300
2011	F	M	7	10	1	4	300
2011	F	M	8	1	3	4	33.3333
2011	F	M	8	2	1	2	100
2011	F	M	8	3	1	4	300
2011	F	M	8	4	2	4	100
2011	F	M	8	5	1	5	400
2011	F	M	8	6	1	4	300
2011	F	M	8	7	2	4	100
2011	F	M	8	8	2	4	100
2011	F	M	8	9	2	4	100
2011	F	M	8	10	2	4	100
2011	F	M	9	1	3	4	33.3333
2011	F	M	9	2	2	3	50
2011	F	M	9	3	1	3	200
2011	F	M	9	4	1	3	200
2011	F	M	9	5	2	5	150
2011	F	M	9	6	1	4	300
2011	F	M	9	7	1	3	200
2011	F	M	9	8	1	5	400
2011	F	M	9	9	1	4	300
2011	F	M	9	10	1	4	300
2011	F	M	10	1	2	4	100
2011	F	M	10	2	3	4	33.3333
2011	F	M	10	3	3	5	66.6667
2011	F	M	10	4	2	5	150
2011	F	M	10	5	1	5	400
2011	F	M	10	6	1	5	400
2011	F	M	10	7	2	5	150
2011	F	M	10	8	1	5	400
2011	F	M	10	9	1	5	400
2011	F	M	10	10	2	5	150
2011	F	M	11	1	2	4	100
2011	F	M	11	2	1	2	100
2011	F	M	11	3	3	5	66.6667
2011	F	M	11	4	2	5	150
2011	F	M	11	5	2	3	50
2011	F	M	11	6	2	5	150
2011	F	M	11	7	2	3	50
2011	F	M	11	8	2	5	150
2011	F	M	11	9	3	5	66.6667
2011	F	M	12	1	3	5	66.6667
2011	F	M	12	2	3	5	66.6667
2011	F	M	12	3	3	5	66.6667
2011	F	M	12	4	2	5	150
2011	F	M	12	5	2	5	150
2011	F	M	12	6	1	5	400
2011	F	M	12	7	4	5	25
2011	F	M	12	8	1	5	400
2011	F	M	12	9	1	5	400
2011	F	M	13	1	4	5	25
2011	F	M	13	2	3	4	33.3333
2011	F	M	13	3	4	5	25
2011	F	M	13	4	3	4	33.3333
2011	F	M	13	5	3	5	66.6667
2011	F	M	13	6	4	5	25
2011	F	M	13	7	3	4	33.3333
2011	F	M	13	8	3	4	33.3333
2011	F	M	13	9	4	5	25
2011	F	M	13	10	3	5	66.6667
2011	F	W	1	1	3	3	0
2011	F	W	1	2	1	2	100
2011	F	W	1	3	2	4	100
2011	F	W	1	4	2	4	100
2011	F	W	1	5	1	3	200
2011	F	W	1	6	1	3	200
2011	F	W	1	7	1	3	200
2011	F	W	1	8	1	2	100
2011	F	W	1	9	1	4	300
2011	F	W	1	10	2	3	50
2011	F	W	2	1	4	4	0
2011	F	W	2	2	2	4	100
2011	F	W	2	3	3	5	66.6667
2011	F	W	2	4	3	5	66.6667
2011	F	W	2	5	1	5	400
2011	F	W	2	6	1	5	400
2011	F	W	2	7	1	4	300
2011	F	W	2	8	2	4	100
2011	F	W	2	9	2	3	50
2011	F	W	2	10	1	2	100
2011	F	W	3	1	3	4	33.3333
2011	F	W	3	2	1	4	300
2011	F	W	3	3	2	4	100
2011	F	W	3	4	2	4	100
2011	F	W	3	5	2	4	100
2011	F	W	3	6	3	4	33.3333
2011	F	W	3	7	2	4	100
2011	F	W	3	8	4	4	0
2011	F	W	3	9	3	4	33.3333
2011	F	W	3	10	2	4	100
2011	F	W	4	1	3	5	66.6667
2011	F	W	4	2	2	4	100
2011	F	W	4	3	3	4	33.3333
2011	F	W	4	4	2	4	100
2011	F	W	4	5	2	4	100
2011	F	W	4	6	2	5	150
2011	F	W	4	7	1	4	300
2011	F	W	4	8	1	5	400
2011	F	W	4	9	2	5	150
2011	F	W	4	10	2	5	150
2011	F	W	5	1	3	4	33.3333
2011	F	W	5	2	2	5	150
2011	F	W	5	3	2	5	150
2011	F	W	5	4	3	5	66.6667
2011	F	W	5	5	2	5	150
2011	F	W	5	6	1	5	400
2011	F	W	5	7	1	5	400
2011	F	W	5	8	1	5	400
2011	F	W	5	9	3	5	66.6667
2011	F	W	5	10	3	5	66.6667
2011	F	W	6	2	1	4	300
2011	F	W	6	3	1	3	200
2011	F	W	6	4	2	3	50
2011	F	W	6	5	2	5	150
2011	F	W	6	6	1	4	300
2011	F	W	6	7	1	3	200
2011	F	W	6	8	1	3	200
2011	F	W	6	9	1	3	200
2011	F	W	6	10	2	3	50
2011	F	W	7	1	3	4	33.3333
2011	F	W	7	2	2	4	100
2011	F	W	7	3	2	5	150
2011	F	W	7	4	3	4	33.3333
2011	F	W	7	5	2	5	150
2011	F	W	7	6	2	4	100
2011	F	W	7	7	2	3	50
2011	F	W	7	8	2	4	100
2011	F	W	7	9	2	4	100
2011	F	W	7	10	3	4	33.3333
2011	F	W	8	1	2	5	150
2011	F	W	8	2	2	4	100
2011	F	W	8	3	4	5	25
2011	F	W	8	4	4	5	25
2011	F	W	8	5	2	4	100
2011	F	W	8	6	2	5	150
2011	F	W	8	7	1	5	400
2011	F	W	8	8	1	5	400
2011	F	W	8	9	3	5	66.6667
2011	F	W	8	10	2	4	100
2011	F	W	9	1	2	4	100
2011	F	W	9	2	2	5	150
2011	F	W	9	3	3	5	66.6667
2011	F	W	9	4	3	5	66.6667
2011	F	W	9	5	1	5	400
2011	F	W	9	6	1	5	400
2011	F	W	9	7	1	5	400
2011	F	W	9	8	1	4	300
2011	F	W	9	9	1	4	300
2011	F	W	9	10	2	4	100
2011	F	W	10	1	4	5	25
2011	F	W	10	2	1	4	300
2011	F	W	10	4	4	4	0
2011	F	W	10	5	1	5	400
2011	F	W	10	6	1	5	400
2011	F	W	10	7	1	5	400
2011	F	W	10	8	1	5	400
2011	F	W	10	9	1	4	300
2011	F	W	10	10	1	4	300
2012	S	W	1	1	3	4	33.3333
2012	S	W	1	1	1	3	200
2012	S	W	1	2	2	3	50
2012	S	W	1	2	3	5	66.6667
2012	S	W	1	3	2	4	100
2012	S	W	1	3	2	4	100
2012	S	W	1	4	1	4	300
2012	S	W	1	4	2	4	100
2012	S	W	2	1	3	4	33.3333
2012	S	W	2	1	3	5	66.6667
2012	S	W	2	2	2	4	100
2012	S	W	2	2	1	4	300
2012	S	W	2	3	3	5	66.6667
2012	S	W	2	3	2	4	100
2012	S	W	2	4	3	5	66.6667
2012	S	W	2	4	2	4	100
2012	S	W	3	1	2	3	50
2012	S	W	3	1	2	3	50
2012	S	W	3	2	1	3	200
2012	S	W	3	2	2	5	150
2012	S	W	3	3	1	3	200
2012	S	W	3	3	2	4	100
2012	S	W	3	4	2	5	150
2012	S	W	3	4	2	4	100
2012	S	W	4	1	3	4	33.3333
2012	S	W	4	1	2	4	100
2012	S	W	4	2	2	3	50
2012	S	W	4	2	2	5	150
2012	S	W	4	3	2	3	50
2012	S	W	4	3	2	4	100
2012	S	W	4	4	1	3	200
2012	S	W	4	4	2	4	100
2012	S	W	5	1	3	4	33.3333
2012	S	W	5	1	2	3	50
2012	S	W	5	2	3	4	33.3333
2012	S	W	5	2	2	5	150
2012	S	W	5	3	3	5	66.6667
2012	S	W	5	3	3	5	66.6667
2012	S	W	5	4	4	5	25
2012	S	W	5	4	2	5	150
2012	S	W	5	5	2	3	50
2012	S	W	6	1	4	5	25
2012	S	W	6	1	2	3	50
2012	S	W	6	2	1	5	400
2012	S	W	6	2	1	3	200
2012	S	W	6	3	3	5	66.6667
2012	S	W	6	3	2	5	150
2012	S	W	6	4	4	5	25
2012	S	W	6	4	3	5	66.6667
2012	S	W	7	1	3	4	33.3333
2012	S	W	7	2	2	4	100
2012	S	W	7	2	2	5	150
2012	S	W	7	3	3	5	66.6667
2012	S	W	7	3	2	5	150
2012	S	W	7	4	2	5	150
2012	S	W	7	4	2	5	150
2012	S	W	8	1	2	4	100
2012	S	W	8	1	3	5	66.6667
2012	S	W	8	2	1	4	300
2012	S	W	8	2	2	5	150
2012	S	W	8	3	2	4	100
2012	S	W	8	3	2	4	100
2012	S	W	8	4	2	4	100
2012	S	W	8	4	3	5	66.6667
2012	S	W	9	1	3	4	33.3333
2012	S	W	9	1	2	3	50
2012	S	W	9	2	1	4	300
2012	S	W	9	2	2	3	50
2012	S	W	9	3	2	3	50
2012	S	W	9	3	2	4	100
2012	S	W	9	4	1	4	300
2012	S	W	9	4	2	5	150
2012	S	W	10	1	3	4	33.3333
2012	S	W	10	1	3	4	33.3333
2012	S	W	10	2	2	4	100
2012	S	W	10	2	1	3	200
2012	S	W	10	3	2	5	150
2012	S	W	10	3	2	5	150
2012	S	W	10	4	2	4	100
2012	S	W	10	4	2	4	100
2012	S	W	11	1	2	4	100
2012	S	W	11	1	2	4	100
2012	S	W	11	2	1	3	200
2012	S	W	11	2	3	5	66.6667
2012	S	W	11	3	1	4	300
2012	S	W	11	3	2	5	150
2012	S	W	11	4	1	4	300
2012	S	W	11	4	3	5	66.6667
2012	S	W	12	1	3	4	33.3333
2012	S	W	12	1	3	5	66.6667
2012	S	W	12	2	2	4	100
2012	S	W	12	2	3	5	66.6667
2012	S	W	12	3	2	4	100
2012	S	W	12	3	2	5	150
2012	S	W	12	4	2	4	100
2012	S	W	12	4	2	5	150
2012	S	W	13	1	2	4	100
2012	S	W	13	1	2	4	100
2012	S	W	13	2	2	5	150
2012	S	W	13	3	1	3	200
2012	S	W	13	3	2	4	100
2012	S	W	13	4	2	4	100
2012	S	W	13	4	2	4	100
2012	S	W	14	1	1	4	300
2012	S	W	14	1	3	5	66.6667
2012	S	W	14	2	3	5	66.6667
2012	S	W	14	2	2	4	100
2012	S	W	14	3	3	5	66.6667
2012	S	W	14	3	2	4	100
2012	S	W	14	4	2	5	150
2012	S	W	14	4	3	4	33.3333
2012	S	W	15	1	4	5	25
2012	S	W	15	1	2	3	50
2012	S	W	15	2	3	4	33.3333
2012	S	W	15	2	2	5	150
2012	S	W	15	3	2	4	100
2012	S	W	15	3	3	5	66.6667
2012	S	W	15	4	2	5	150
2012	S	W	15	4	3	5	66.6667
2012	S	W	16	1	3	4	33.3333
2012	S	W	16	2	1	3	200
2012	S	W	16	3	2	5	150
2012	S	W	16	4	3	5	66.6667
2012	S	W	17	1	2	3	50
2012	S	W	17	2	2	5	150
2012	S	W	17	3	2	5	150
2012	S	W	17	4	3	5	66.6667
2012	S	W	18	1	4	5	25
2012	S	W	18	2	2	4	100
2012	S	W	18	3	3	5	66.6667
2012	S	W	18	4	2	4	100
2012	S	W	19	1	2	3	50
2012	S	W	19	2	2	5	150
2012	S	W	19	3	3	5	66.6667
2012	S	W	19	4	2	4	100
2012	S	W	20	1	3	5	66.6667
2012	S	W	20	2	1	3	200
2012	S	W	20	3	2	4	100
2012	S	W	20	4	2	4	100
2012	S	W	21	1	2	4	100
2012	S	W	21	2	2	4	100
2012	S	W	21	3	2	5	150
2012	S	W	21	4	2	4	100
2012	S	W	22	1	3	4	33.3333
2012	S	W	22	2	2	5	150
2012	S	W	22	3	2	5	150
2012	S	W	22	4	2	4	100
2013	S	W	1	5	3	5	66.6667
2013	S	W	1	5	2	4	100
2013	S	W	1	6	3	4	33.3333
2013	S	W	1	6	2	4	100
2013	S	W	1	7	4	4	0
2013	S	W	1	7	3	5	66.6667
2013	S	W	1	8	3	4	33.3333
2013	S	W	1	8	2	5	150
2013	S	W	1	9	3	4	33.3333
2013	S	W	1	9	2	5	150
2013	S	W	1	10	2	5	150
2013	S	W	1	10	1	5	400
2013	S	W	2	5	2	4	100
2013	S	W	2	5	2	5	150
2013	S	W	2	6	2	4	100
2013	S	W	2	6	1	3	200
2013	S	W	2	7	2	4	100
2013	S	W	2	7	1	5	400
2013	S	W	2	8	3	4	33.3333
2013	S	W	2	8	2	5	150
2013	S	W	2	9	2	4	100
2013	S	W	2	9	2	4	100
2013	S	W	2	10	2	4	100
2013	S	W	2	10	2	5	150
2013	S	W	3	5	1	5	400
2013	S	W	3	5	2	4	100
2013	S	W	3	6	1	3	200
2013	S	W	3	6	1	3	200
2013	S	W	3	7	1	3	200
2013	S	W	3	7	2	5	150
2013	S	W	3	8	1	3	200
2013	S	W	3	8	1	3	200
2013	S	W	3	9	1	3	200
2013	S	W	3	9	2	4	100
2013	S	W	3	10	1	3	200
2013	S	W	3	10	2	4	100
2013	S	W	4	5	3	4	33.3333
2013	S	W	4	5	1	4	300
2013	S	W	4	6	1	2	100
2013	S	W	4	6	2	5	150
2013	S	W	4	7	2	4	100
2013	S	W	4	7	2	5	150
2013	S	W	4	8	1	2	100
2013	S	W	4	8	3	5	66.6667
2013	S	W	4	9	2	4	100
2013	S	W	4	9	3	5	66.6667
2013	S	W	4	10	1	3	200
2013	S	W	4	10	1	4	300
2013	S	W	5	5	2	5	150
2013	S	W	5	6	2	4	100
2013	S	W	5	6	2	5	150
2013	S	W	5	7	2	3	50
2013	S	W	5	7	3	5	66.6667
2013	S	W	5	8	2	4	100
2013	S	W	5	8	1	4	300
2013	S	W	5	9	3	5	66.6667
2013	S	W	5	9	2	5	150
2013	S	W	5	10	2	4	100
2013	S	W	5	10	2	4	100
2013	S	W	6	5	1	4	300
2013	S	W	6	5	1	4	300
2013	S	W	6	6	1	4	300
2013	S	W	6	6	2	5	150
2013	S	W	6	7	1	4	300
2013	S	W	6	7	1	4	300
2013	S	W	6	8	1	5	400
2013	S	W	6	8	1	4	300
2013	S	W	6	9	1	5	400
2013	S	W	6	9	2	5	150
2013	S	W	6	10	2	5	150
2013	S	W	6	10	2	4	100
2013	S	W	7	5	2	3	50
2013	S	W	7	5	2	5	150
2013	S	W	7	6	1	4	300
2013	S	W	7	6	1	3	200
2013	S	W	7	7	2	3	50
2013	S	W	7	7	1	5	400
2013	S	W	7	8	1	3	200
2013	S	W	7	8	2	3	50
2013	S	W	7	9	4	5	25
2013	S	W	7	9	2	5	150
2013	S	W	7	10	3	5	66.6667
2013	S	W	7	10	2	4	100
2013	S	W	8	5	1	5	400
2013	S	W	8	5	2	4	100
2013	S	W	8	6	2	4	100
2013	S	W	8	6	1	3	200
2013	S	W	8	7	1	4	300
2013	S	W	8	7	2	5	150
2013	S	W	8	8	1	3	200
2013	S	W	8	8	1	4	300
2013	S	W	8	9	1	4	300
2013	S	W	8	9	1	3	200
2013	S	W	8	10	1	4	300
2013	S	W	8	10	2	4	100
2013	S	W	9	5	1	5	400
2013	S	W	9	5	2	5	150
2013	S	W	9	6	1	4	300
2013	S	W	9	6	1	3	200
2013	S	W	9	7	1	3	200
2013	S	W	9	7	1	4	300
2013	S	W	9	8	1	3	200
2013	S	W	9	8	2	5	150
2013	S	W	9	9	1	4	300
2013	S	W	9	9	2	5	150
2013	S	W	9	10	1	4	300
2013	S	W	9	10	2	5	150
2013	S	W	10	5	3	4	33.3333
2013	S	W	10	5	2	4	100
2013	S	W	10	6	3	5	66.6667
2013	S	W	10	6	2	5	150
2013	S	W	10	7	1	5	400
2013	S	W	10	7	2	5	150
2013	S	W	10	8	1	5	400
2013	S	W	10	8	3	5	66.6667
2013	S	W	10	9	1	5	400
2013	S	W	10	9	1	5	400
2013	S	W	10	10	1	4	300
2013	S	W	10	10	2	5	150
2013	S	W	11	5	2	3	50
2013	S	W	11	5	2	5	150
2013	S	W	11	6	1	3	200
2013	S	W	11	6	1	3	200
2013	S	W	11	7	1	4	300
2013	S	W	11	7	1	3	200
2013	S	W	11	8	1	4	300
2013	S	W	11	8	2	5	150
2013	S	W	11	9	1	4	300
2013	S	W	11	9	1	3	200
2013	S	W	11	10	1	4	300
2013	S	W	11	10	2	5	150
2013	S	W	12	5	2	5	150
2013	S	W	12	5	3	5	66.6667
2013	S	W	12	6	1	5	400
2013	S	W	12	6	2	5	150
2013	S	W	12	7	1	5	400
2013	S	W	12	7	2	5	150
2013	S	W	12	8	3	4	33.3333
2013	S	W	12	8	2	5	150
2013	S	W	12	9	2	5	150
2013	S	W	12	9	2	5	150
2013	S	W	12	10	2	5	150
2013	S	W	12	10	1	4	300
2013	S	W	13	5	1	4	300
2013	S	W	13	5	2	5	150
2013	S	W	13	6	1	4	300
2013	S	W	13	6	2	4	100
2013	S	W	13	7	1	3	200
2013	S	W	13	7	2	4	100
2013	S	W	13	8	1	4	300
2013	S	W	13	8	1	4	300
2013	S	W	13	9	1	4	300
2013	S	W	13	9	1	3	200
2013	S	W	13	10	1	4	300
2013	S	W	13	10	2	5	150
2013	S	W	14	5	1	5	400
2013	S	W	14	5	2	5	150
2013	S	W	14	6	2	5	150
2013	S	W	14	6	1	3	200
2013	S	W	14	7	1	4	300
2013	S	W	14	7	1	3	200
2013	S	W	14	8	1	4	300
2013	S	W	14	8	1	4	300
2013	S	W	14	9	2	5	150
2013	S	W	14	9	2	5	150
2013	S	W	14	10	2	5	150
2013	S	W	14	10	1	3	200
2013	S	W	15	5	2	5	150
2013	S	W	15	6	2	5	150
2013	S	W	15	6	1	3	200
2013	S	W	15	7	4	5	25
2013	S	W	15	7	1	3	200
2013	S	W	15	8	4	4	0
2013	S	W	15	8	2	5	150
2013	S	W	15	9	2	4	100
2013	S	W	15	9	1	2	100
2013	S	W	15	10	1	3	200
2013	S	W	15	10	1	4	300
2013	S	W	16	5	2	5	150
2013	S	W	16	6	1	4	300
2013	S	W	16	7	2	5	150
2013	S	W	16	8	3	5	66.6667
2013	S	W	16	9	2	5	150
2013	S	W	16	10	2	5	150
2013	S	W	17	5	2	5	150
2013	S	W	17	6	1	3	200
2013	S	W	17	7	2	5	150
2013	S	W	17	8	2	5	150
2013	S	W	17	9	2	4	100
2013	S	W	17	10	3	5	66.6667
2013	S	W	18	5	1	4	300
2013	S	W	18	6	1	3	200
2013	S	W	18	7	2	5	150
2013	S	W	18	8	1	5	400
2013	S	W	18	9	2	4	100
2013	S	W	18	10	1	3	200
2013	S	W	19	5	1	4	300
2013	S	W	19	6	1	4	300
2013	S	W	19	7	2	5	150
2013	S	W	19	8	2	4	100
2013	S	W	19	9	1	4	300
2013	S	W	19	10	2	4	100
2013	S	W	20	5	2	4	100
2013	S	W	20	6	2	5	150
2013	S	W	20	7	1	4	300
2013	S	W	20	8	2	5	150
2013	S	W	20	9	1	4	300
2013	S	W	20	10	2	4	100
2013	S	W	21	5	1	4	300
2013	S	W	21	6	1	4	300
2013	S	W	21	7	1	3	200
2013	S	W	21	8	2	5	150
2013	S	W	21	9	2	5	150
2013	S	W	21	10	2	4	100
2013	S	W	22	5	2	5	150
2013	S	W	22	6	1	3	200
2013	S	W	22	7	2	5	150
2013	S	W	22	8	1	4	300
2013	S	W	22	9	3	5	66.6667
2013	S	W	22	10	2	5	150
2015	F	F	1	1	2	3	50
2015	F	F	1	2	2	4	100
2015	F	F	1	3	2	4	100
2015	F	F	1	4	2	4	100
2015	F	F	1	5	3	3	0
2015	F	F	1	6	3	3	0
2015	F	F	1	7	2	3	50
2015	F	F	1	8	2	2	0
2015	F	F	1	9	2	2	0
2015	F	F	1	10	2	3	50
2015	F	F	2	1	2	5	150
2015	F	F	2	2	3	4	33.3333
2015	F	F	2	3	3	5	66.6667
2015	F	F	2	4	1	4	300
2015	F	F	2	5	2	4	100
2015	F	F	2	6	1	4	300
2015	F	F	2	7	1	3	200
2015	F	F	2	8	1	3	200
2015	F	F	2	9	2	4	100
2015	F	F	2	10	2	4	100
2015	F	F	3	1	3	5	66.6667
2015	F	F	3	2	2	4	100
2015	F	F	3	3	2	5	150
2015	F	F	3	4	1	5	400
2015	F	F	3	5	2	4	100
2015	F	F	3	6	1	5	400
2015	F	F	3	7	1	4	300
2015	F	F	3	8	3	4	33.3333
2015	F	F	3	9	1	5	400
2015	F	F	3	10	1	4	300
2015	F	F	4	1	5	4	0
2015	F	F	4	2	1	4	300
2015	F	F	4	3	3	5	66.6667
2015	F	F	4	4	1	5	400
2015	F	F	4	5	2	5	150
2015	F	F	4	6	1	5	400
2015	F	F	4	7	1	4	300
2015	F	F	4	8	1	4	300
2015	F	F	4	9	1	5	400
2015	F	F	4	10	1	5	400
2015	F	F	5	1	3	3	0
2015	F	F	5	2	1	4	300
2015	F	F	5	3	1	4	300
2015	F	F	5	4	1	4	300
2015	F	F	5	5	2	4	100
2015	F	F	5	6	1	3	200
2015	F	F	5	7	1	4	300
2015	F	F	5	8	1	3	200
2015	F	F	5	9	1	4	300
2015	F	F	5	10	1	3	200
2015	F	F	6	1	3	4	33.3333
2015	F	F	6	2	2	4	100
2015	F	F	6	3	3	5	66.6667
2015	F	F	6	4	3	5	66.6667
2015	F	F	6	5	1	5	400
2015	F	F	6	6	2	5	150
2015	F	F	6	7	2	4	100
2015	F	F	6	8	2	4	100
2015	F	F	6	9	3	5	66.6667
2015	F	F	6	10	2	4	100
2015	F	F	7	1	1	3	200
2015	F	F	7	2	2	3	50
2015	F	F	7	3	2	5	150
2015	F	F	7	4	2	5	150
2015	F	F	7	5	2	4	100
2015	F	F	7	6	1	3	200
2015	F	F	7	7	1	4	300
2015	F	F	7	8	1	3	200
2015	F	F	7	9	2	3	50
2015	F	F	7	10	1	5	400
2015	F	F	8	1	2	5	150
2015	F	F	8	2	3	5	66.6667
2015	F	F	8	3	3	5	66.6667
2015	F	F	8	4	4	5	25
2015	F	F	8	5	2	5	150
2015	F	F	8	6	2	5	150
2015	F	F	8	7	2	5	150
2015	F	F	8	8	1	5	400
2015	F	F	8	9	2	5	150
2015	F	F	8	10	2	5	150
2015	F	F	9	1	3	4	33.3333
2015	F	F	9	2	2	4	100
2015	F	F	9	3	2	4	100
2015	F	F	9	4	2	3	50
2015	F	F	9	5	3	4	33.3333
2015	F	F	9	6	1	4	300
2015	F	F	9	7	2	4	100
2015	F	F	9	8	2	3	50
2015	F	F	9	9	2	4	100
2015	F	F	9	10	2	3	50
2015	F	F	10	1	3	4	33.3333
2015	F	F	10	2	1	4	300
2015	F	F	10	3	2	5	150
2015	F	F	10	4	2	5	150
2015	F	F	10	5	2	5	150
2015	F	F	10	6	1	4	300
2015	F	F	10	7	2	5	150
2015	F	F	10	8	1	4	300
2015	F	F	10	9	1	4	300
2015	F	F	10	10	1	3	200
2015	F	F	11	1	4	4	0
2015	F	F	11	2	2	4	100
2015	F	F	11	3	2	4	100
2015	F	F	11	4	2	4	100
2015	F	F	11	5	2	5	150
2015	F	F	11	6	1	4	300
2015	F	F	11	7	2	4	100
2015	F	F	11	8	2	4	100
2015	F	F	11	9	1	4	300
2015	F	F	11	10	2	4	100
2015	F	TH	1	1	3	5	66.6667
2015	F	TH	1	2	2	4	100
2015	F	TH	1	3	3	5	66.6667
2015	F	TH	1	4	3	5	66.6667
2015	F	TH	1	5	3	5	66.6667
2015	F	TH	1	6	3	5	66.6667
2015	F	TH	1	7	3	5	66.6667
2015	F	TH	1	8	3	5	66.6667
2015	F	TH	1	9	2	5	150
2015	F	TH	1	10	1	5	400
2015	F	TH	2	1	3	5	66.6667
2015	F	TH	2	2	4	5	25
2015	F	TH	2	3	2	4	100
2015	F	TH	2	4	2	4	100
2015	F	TH	2	5	2	5	150
2015	F	TH	2	6	3	4	33.3333
2015	F	TH	2	7	3	5	66.6667
2015	F	TH	2	8	4	5	25
2015	F	TH	2	9	3	5	66.6667
2015	F	TH	2	10	2	5	150
2015	F	TH	3	1	3	4	33.3333
2015	F	TH	3	2	2	4	100
2015	F	TH	3	3	2	4	100
2015	F	TH	3	4	2	4	100
2015	F	TH	3	5	2	4	100
2015	F	TH	3	6	2	4	100
2015	F	TH	3	7	1	4	300
2015	F	TH	3	8	4	4	0
2015	F	TH	3	9	2	4	100
2015	F	TH	3	10	2	3	50
2015	F	TH	4	1	4	4	0
2015	F	TH	4	2	2	4	100
2015	F	TH	4	3	3	4	33.3333
2015	F	TH	4	4	1	5	400
2015	F	TH	4	5	1	4	300
2015	F	TH	4	6	1	4	300
2015	F	TH	4	7	1	4	300
2015	F	TH	4	8	1	4	300
2015	F	TH	4	9	2	4	100
2015	F	TH	4	10	1	4	300
2015	F	TH	5	1	1	4	300
2015	F	TH	5	2	3	5	66.6667
2015	F	TH	5	3	2	5	150
2015	F	TH	5	4	2	4	100
2015	F	TH	5	5	2	5	150
2015	F	TH	5	6	1	4	300
2015	F	TH	5	7	1	4	300
2015	F	TH	5	8	3	4	33.3333
2015	F	TH	5	9	1	5	400
2015	F	TH	5	10	2	4	100
2015	F	TH	6	1	3	4	33.3333
2015	F	TH	6	2	2	4	100
2015	F	TH	6	3	3	4	33.3333
2015	F	TH	6	4	2	4	100
2015	F	TH	6	5	1	4	300
2015	F	TH	6	6	1	4	300
2015	F	TH	6	7	1	4	300
2015	F	TH	6	8	1	4	300
2015	F	TH	6	9	2	4	100
2015	F	TH	6	10	2	4	100
2015	F	TH	7	1	1	4	300
2015	F	TH	7	2	1	3	200
2015	F	TH	7	3	1	3	200
2015	F	TH	7	4	2	3	50
2015	F	TH	7	5	2	5	150
2015	F	TH	7	6	1	5	400
2015	F	TH	7	7	1	5	400
2015	F	TH	7	8	1	5	400
2015	F	TH	7	9	1	5	400
2015	F	TH	7	10	1	5	400
2015	F	TH	8	1	2	4	100
2015	F	TH	8	2	2	5	150
2015	F	TH	8	3	1	5	400
2015	F	TH	8	4	1	5	400
2015	F	TH	8	5	3	5	66.6667
2015	F	TH	8	6	1	4	300
2015	F	TH	8	7	1	4	300
2015	F	TH	8	8	1	4	300
2015	F	TH	8	9	1	4	300
2015	F	TH	8	10	2	4	100
2015	F	TH	9	1	2	4	100
2015	F	TH	9	2	2	4	100
2015	F	TH	9	3	3	4	33.3333
2015	F	TH	9	4	2	4	100
2015	F	TH	9	5	1	3	200
2015	F	TH	9	6	2	4	100
2015	F	TH	9	7	1	3	200
2015	F	TH	9	8	1	4	300
2015	F	TH	9	9	1	4	300
2015	F	TH	9	10	1	3	200
2015	F	TH	10	1	3	5	66.6667
2015	F	TH	10	2	2	4	100
2015	F	TH	10	3	4	4	0
2015	F	TH	10	4	2	5	150
2015	F	TH	10	5	2	5	150
2015	F	TH	10	6	2	4	100
2015	F	TH	10	7	1	3	200
2015	F	TH	10	8	1	3	200
2015	F	TH	10	9	3	4	33.3333
2015	F	TH	10	10	2	4	100
2015	F	TH	11	1	3	4	33.3333
2015	F	TH	11	2	2	4	100
2015	F	TH	11	3	2	4	100
2015	F	TH	11	4	2	4	100
2015	F	TH	11	5	2	3	50
2015	F	TH	11	6	1	5	400
2015	F	TH	11	7	4	4	0
2015	F	TH	11	8	3	4	33.3333
2015	F	TH	11	9	2	2	0
2015	F	TH	11	10	2	5	150
2015	F	TH	12	1	2	4	100
2015	F	TH	12	2	2	4	100
2015	F	TH	12	3	3	4	33.3333
2015	F	TH	12	4	2	4	100
2015	F	TH	12	5	2	4	100
2015	F	TH	12	6	3	4	33.3333
2015	F	TH	12	7	1	3	200
2015	F	TH	12	8	1	3	200
2015	F	TH	12	9	1	4	300
2015	F	TH	12	10	1	2	100
2015	F	TH	13	1	3	4	33.3333
2015	F	TH	13	2	3	4	33.3333
2015	F	TH	13	3	3	4	33.3333
2015	F	TH	13	4	2	3	50
2015	F	TH	13	5	3	4	33.3333
2015	F	TH	13	6	2	2	0
2015	F	TH	13	7	2	2	0
2015	F	TH	13	8	2	3	50
2015	F	TH	13	9	2	5	150
2015	F	TH	13	10	3	5	66.6667
2015	F	TH	14	1	3	4	33.3333
2015	F	TH	14	2	1	4	300
2015	F	TH	14	3	3	4	33.3333
2015	F	TH	14	4	3	4	33.3333
2015	F	TH	14	5	2	4	100
2015	F	TH	14	6	2	4	100
2015	F	TH	14	7	1	4	300
2015	F	TH	14	8	1	4	300
2015	F	TH	14	9	2	4	100
2015	F	TH	14	10	2	4	100
2015	F	TH	15	1	1	3	200
2015	F	TH	15	2	1	4	300
2015	F	TH	15	3	1	3	200
2015	F	TH	15	4	2	3	50
2015	F	TH	15	5	2	3	50
2015	F	TH	15	6	1	3	200
2015	F	TH	15	7	1	3	200
2015	F	TH	15	8	1	3	200
2015	F	TH	15	9	1	3	200
2015	F	TH	15	10	2	3	50
2015	F	TH	16	1	4	3	0
2015	F	TH	16	2	2	3	50
2015	F	TH	16	3	4	4	0
2015	F	TH	16	4	4	4	0
2015	F	TH	16	5	2	5	150
2015	F	TH	16	6	2	3	50
2015	F	TH	16	7	2	3	50
2015	F	TH	16	8	2	3	50
2015	F	TH	16	9	2	4	100
2015	F	TH	16	10	2	4	100
2015	F	TH	17	1	3	4	33.3333
2015	F	TH	17	2	4	4	0
2015	F	TH	17	3	4	4	0
2015	F	TH	17	4	4	4	0
2015	F	TH	17	5	5	5	0
2015	F	TH	17	6	4	5	25
2015	F	TH	17	7	4	5	25
2015	F	TH	17	8	4	5	25
2015	F	TH	17	9	5	5	0
2015	F	TH	17	10	3	4	33.3333
2015	F	TH	18	1	2	3	50
2015	F	TH	18	2	2	4	100
2015	F	TH	18	3	1	4	300
2015	F	TH	18	4	2	4	100
2015	F	TH	18	5	2	4	100
2015	F	TH	18	6	2	4	100
2015	F	TH	18	7	1	2	100
2015	F	TH	18	8	1	3	200
2015	F	TH	18	9	1	4	300
2015	F	TH	18	10	1	4	300
2015	F	TH	19	1	1	5	400
2015	F	TH	19	2	2	4	100
2015	F	TH	19	3	1	4	300
2015	F	TH	19	4	1	4	300
2015	F	TH	19	5	1	3	200
2015	F	TH	19	6	1	3	200
2015	F	TH	19	7	1	4	300
2015	F	TH	19	8	2	4	100
2015	F	TH	19	9	1	4	300
2015	F	TH	19	10	1	4	300
2015	F	TH	20	1	2	4	100
2015	F	TH	20	2	3	5	66.6667
2015	F	TH	20	3	2	4	100
2015	F	TH	20	4	2	4	100
2015	F	TH	20	5	1	5	400
2015	F	TH	20	6	2	4	100
2015	F	TH	20	7	1	4	300
2015	F	TH	20	8	4	4	0
2015	F	TH	20	9	3	4	33.3333
2015	F	TH	20	10	1	5	400
2016	F	T	1	1	4	5	25
2016	F	T	1	2	1	4	300
2016	F	T	1	3	3	5	66.6667
2016	F	T	1	4	3	5	66.6667
2016	F	T	1	5	3	5	66.6667
2016	F	T	1	6	1	5	400
2016	F	T	1	7	3	5	66.6667
2016	F	T	1	8	2	4	100
2016	F	T	1	9	2	5	150
2016	F	T	1	10	1	5	400
2016	F	T	2	1	2	3	50
2016	F	T	2	2	1	4	300
2016	F	T	2	3	1	4	300
2016	F	T	2	4	1	3	200
2016	F	T	2	5	1	5	400
2016	F	T	2	6	1	4	300
2016	F	T	2	7	1	2	100
2016	F	T	2	8	1	2	100
2016	F	T	2	9	1	2	100
2016	F	T	2	10	1	2	100
2016	F	T	3	1	3	4	33.3333
2016	F	T	3	2	2	3	50
2016	F	T	3	3	2	3	50
2016	F	T	3	4	2	4	100
2016	F	T	3	5	2	4	100
2016	F	T	3	6	2	3	50
2016	F	T	3	7	2	3	50
2016	F	T	3	8	2	3	50
2016	F	T	3	9	3	5	66.6667
2016	F	T	3	10	2	4	100
2016	F	T	4	1	4	5	25
2016	F	T	4	2	3	5	66.6667
2016	F	T	4	3	3	5	66.6667
2016	F	T	4	4	3	5	66.6667
2016	F	T	4	5	2	4	100
2016	F	T	4	6	1	5	400
2016	F	T	4	7	1	4	300
2016	F	T	4	8	1	4	300
2016	F	T	4	9	2	5	150
2016	F	T	4	10	3	5	66.6667
2016	F	T	5	1	3	3	0
2016	F	T	5	2	2	3	50
2016	F	T	5	3	1	3	200
2016	F	T	5	4	1	3	200
2016	F	T	5	5	1	3	200
2016	F	T	5	6	1	1	0
2016	F	T	5	7	1	3	200
2016	F	T	5	8	1	2	100
2016	F	T	5	9	1	4	300
2016	F	T	5	10	1	4	300
2016	F	T	6	1	3	4	33.3333
2016	F	T	6	2	1	4	300
2016	F	T	6	3	3	4	33.3333
2016	F	T	6	4	3	4	33.3333
2016	F	T	6	5	1	5	400
2016	F	T	6	6	2	3	50
2016	F	T	6	7	2	4	100
2016	F	T	6	8	1	4	300
2016	F	T	6	9	1	3	200
2016	F	T	6	10	1	4	300
2016	F	T	7	1	2	4	100
2016	F	T	7	2	3	5	66.6667
2016	F	T	7	3	1	4	300
2016	F	T	7	4	1	4	300
2016	F	T	7	5	1	5	400
2016	F	T	7	6	1	4	300
2016	F	T	7	7	1	4	300
2016	F	T	7	8	1	4	300
2016	F	T	7	9	1	4	300
2016	F	T	7	10	1	3	200
2016	F	T	8	1	3	5	66.6667
2016	F	T	8	2	2	5	150
2016	F	T	8	3	1	5	400
2016	F	T	8	4	1	5	400
2016	F	T	8	5	3	4	33.3333
2016	F	T	8	6	1	5	400
2016	F	T	8	7	1	4	300
2016	F	T	8	8	3	5	66.6667
2016	F	T	8	9	3	4	33.3333
2016	F	T	8	10	1	5	400
2016	F	T	9	1	3	4	33.3333
2016	F	T	9	2	2	5	150
2016	F	T	9	3	1	4	300
2016	F	T	9	4	1	5	400
2016	F	T	9	5	1	3	200
2016	F	T	9	6	1	4	300
2016	F	T	9	7	1	4	300
2016	F	T	9	8	1	3	200
2016	F	T	9	9	1	4	300
2016	F	T	9	10	1	4	300
2016	F	T	10	1	4	4	0
2016	F	T	10	2	2	4	100
2016	F	T	10	3	1	4	300
2016	F	T	10	4	1	4	300
2016	F	T	10	5	3	5	66.6667
2016	F	T	10	6	2	3	50
2016	F	T	10	7	1	3	200
2016	F	T	10	8	1	4	300
2016	F	T	10	9	1	5	400
2016	F	T	10	10	1	4	300
2016	F	T	11	1	3	4	33.3333
2016	F	T	11	2	2	5	150
2016	F	T	11	3	3	4	33.3333
2016	F	T	11	4	3	5	66.6667
2016	F	T	11	5	3	5	66.6667
2016	F	T	11	6	2	4	100
2016	F	T	11	7	3	4	33.3333
2016	F	T	11	8	3	4	33.3333
2016	F	T	11	9	2	4	100
2016	F	T	11	10	2	4	100
2016	F	T	12	1	3	3	0
2016	F	T	12	2	3	3	0
2016	F	T	12	3	3	4	33.3333
2016	F	T	12	4	2	3	50
2016	F	T	12	5	1	4	300
2016	F	T	12	6	3	3	0
2016	F	T	12	7	1	4	300
2016	F	T	12	8	2	4	100
2016	F	T	12	9	1	3	200
2016	F	T	12	10	3	4	33.3333
2016	F	T	13	1	3	4	33.3333
2016	F	T	13	2	1	3	200
2016	F	T	13	3	3	3	0
2016	F	T	13	4	2	3	50
2016	F	T	13	5	1	5	400
2016	F	T	13	6	2	4	100
2016	F	T	13	7	1	4	300
2016	F	T	13	8	1	3	200
2016	F	T	13	9	2	3	50
2016	F	T	13	10	1	4	300
2016	F	T	14	1	4	4	0
2016	F	T	14	2	2	3	50
2016	F	T	14	3	3	5	66.6667
2016	F	T	14	4	2	4	100
2016	F	T	14	5	1	5	400
2016	F	T	14	6	2	4	100
2016	F	T	14	7	1	4	300
2016	F	T	14	8	1	4	300
2016	F	T	14	9	2	5	150
2016	F	T	14	10	1	4	300
2016	F	T	15	1	4	4	0
2016	F	T	15	2	1	4	300
2016	F	T	15	3	2	5	150
2016	F	T	15	4	2	4	100
2016	F	T	15	5	1	5	400
2016	F	T	15	6	1	4	300
2016	F	T	15	7	2	4	100
2016	F	T	15	8	3	4	33.3333
2016	F	T	15	9	2	3	50
2016	F	T	15	10	3	4	33.3333
2016	F	T	16	1	4	5	25
2016	F	T	16	2	2	3	50
2016	F	T	16	3	2	4	100
2016	F	T	16	4	3	4	33.3333
2016	F	T	16	5	1	5	400
2016	F	T	16	6	2	2	0
2016	F	T	16	7	1	3	200
2016	F	T	16	8	2	3	50
2016	F	T	16	9	1	2	100
2016	F	T	16	10	2	3	50
2016	F	T	17	1	3	3	0
2016	F	T	17	2	2	3	50
2016	F	T	17	3	2	4	100
2016	F	T	17	4	3	4	33.3333
2016	F	T	17	5	3	4	33.3333
2016	F	T	17	6	3	4	33.3333
2016	F	T	17	7	2	3	50
2016	F	T	17	8	2	3	50
2016	F	T	17	9	2	4	100
2016	F	T	17	10	3	4	33.3333
2016	F	T	18	1	2	3	50
2016	F	T	18	2	1	4	300
2016	F	T	18	3	1	4	300
2016	F	T	18	4	1	3	200
2016	F	T	18	5	1	4	300
2016	F	T	18	6	1	3	200
2016	F	T	18	7	1	3	200
2016	F	T	18	8	1	2	100
2016	F	T	18	9	1	3	200
2016	F	T	18	10	1	4	300
2016	F	T	19	1	4	5	25
2016	F	T	19	2	3	4	33.3333
2016	F	T	19	3	3	5	66.6667
2016	F	T	19	4	3	4	33.3333
2016	F	T	19	5	2	4	100
2016	F	T	19	6	2	5	150
2016	F	T	19	7	1	4	300
2016	F	T	19	8	1	4	300
2016	F	T	19	9	2	5	150
2016	F	T	19	10	1	4	300
2016	F	T	20	1	3	4	33.3333
2016	F	T	20	2	2	4	100
2016	F	T	20	3	2	4	100
2016	F	T	20	4	2	4	100
2016	F	T	20	5	3	5	66.6667
2016	F	T	20	6	2	4	100
2016	F	T	20	7	4	4	0
2016	F	T	20	8	2	5	150
2016	F	T	20	9	3	4	33.3333
2016	F	T	20	10	4	5	25
2016	F	T	21	1	3	4	33.3333
2016	F	T	21	2	2	3	50
2016	F	T	21	3	3	4	33.3333
2016	F	T	21	4	3	4	33.3333
2016	F	T	21	5	3	3	0
2016	F	T	21	6	4	3	-25
2016	F	T	21	7	3	4	33.3333
2016	F	T	21	8	3	3	0
2016	F	T	21	9	3	4	33.3333
2016	F	T	21	10	3	3	0
2016	F	TH	1	1	3	4	33.3333
2016	F	TH	1	2	3	4	33.3333
2016	F	TH	1	3	3	4	33.3333
2016	F	TH	1	4	4	4	0
2016	F	TH	1	5	2	5	150
2016	F	TH	1	6	2	4	100
2016	F	TH	1	7	2	4	100
2016	F	TH	1	8	3	5	66.6667
2016	F	TH	1	9	2	4	100
2016	F	TH	1	10	2	4	100
2016	F	TH	2	1	3	4	33.3333
2016	F	TH	2	2	1	4	300
2016	F	TH	2	3	2	4	100
2016	F	TH	2	4	2	4	100
2016	F	TH	2	5	1	5	400
2016	F	TH	2	6	1	3	200
2016	F	TH	2	7	1	4	300
2016	F	TH	2	8	1	3	200
2016	F	TH	2	9	1	4	300
2016	F	TH	2	10	1	4	300
2016	F	TH	3	1	1	3	200
2016	F	TH	3	2	1	3	200
2016	F	TH	3	3	1	3	200
2016	F	TH	3	4	1	3	200
2016	F	TH	3	5	1	3	200
2016	F	TH	3	6	1	4	300
2016	F	TH	3	7	1	3	200
2016	F	TH	3	8	1	5	400
2016	F	TH	3	9	1	3	200
2016	F	TH	3	10	1	3	200
2016	F	TH	4	1	2	3	50
2016	F	TH	4	2	1	3	200
2016	F	TH	4	3	1	3	200
2016	F	TH	4	4	1	3	200
2016	F	TH	4	5	1	3	200
2016	F	TH	4	6	1	3	200
2016	F	TH	4	7	1	4	300
2016	F	TH	4	8	1	4	300
2016	F	TH	4	9	1	3	200
2016	F	TH	4	10	1	3	200
2016	F	TH	5	1	2	3	50
2016	F	TH	5	2	1	4	300
2016	F	TH	5	3	3	4	33.3333
2016	F	TH	5	4	2	4	100
2016	F	TH	5	5	1	3	200
2016	F	TH	5	6	2	4	100
2016	F	TH	5	7	1	4	300
2016	F	TH	5	8	1	4	300
2016	F	TH	5	9	1	5	400
2016	F	TH	5	10	1	5	400
2016	F	TH	6	1	2	4	100
2016	F	TH	6	2	2	4	100
2016	F	TH	6	3	2	5	150
2016	F	TH	6	4	2	5	150
2016	F	TH	6	5	1	5	400
2016	F	TH	6	6	1	5	400
2016	F	TH	6	7	1	4	300
2016	F	TH	6	8	1	3	200
2016	F	TH	6	9	1	5	400
2016	F	TH	6	10	1	5	400
2016	F	TH	7	1	3	3	0
2016	F	TH	7	2	2	4	100
2016	F	TH	7	3	3	4	33.3333
2016	F	TH	7	4	2	4	100
2016	F	TH	7	5	2	4	100
2016	F	TH	7	6	2	4	100
2016	F	TH	7	7	1	4	300
2016	F	TH	7	8	2	4	100
2016	F	TH	7	9	2	4	100
2016	F	TH	7	10	2	4	100
2016	F	TH	8	1	4	5	25
2016	F	TH	8	2	2	4	100
2016	F	TH	8	3	3	5	66.6667
2016	F	TH	8	4	2	5	150
2016	F	TH	8	5	3	3	0
2016	F	TH	8	6	1	3	200
2016	F	TH	8	7	1	4	300
2016	F	TH	8	8	3	4	33.3333
2016	F	TH	8	9	1	5	400
2016	F	TH	8	10	1	4	300
2016	F	TH	9	1	2	4	100
2016	F	TH	9	2	1	5	400
2016	F	TH	9	3	3	4	33.3333
2016	F	TH	9	4	3	4	33.3333
2016	F	TH	9	5	1	5	400
2016	F	TH	9	6	2	5	150
2016	F	TH	9	7	1	3	200
2016	F	TH	9	8	2	3	50
2016	F	TH	9	9	1	4	300
2016	F	TH	9	10	2	4	100
2016	F	TH	10	1	4	5	25
2016	F	TH	10	2	1	4	300
2016	F	TH	10	3	3	5	66.6667
2016	F	TH	10	4	1	5	400
2016	F	TH	10	5	1	4	300
2016	F	TH	10	6	1	4	300
2016	F	TH	10	7	1	5	400
2016	F	TH	10	8	1	5	400
2016	F	TH	10	9	3	4	33.3333
2016	F	TH	10	10	1	4	300
2016	F	TH	11	1	3	5	66.6667
2016	F	TH	11	2	1	3	200
2016	F	TH	11	3	3	4	33.3333
2016	F	TH	11	4	3	5	66.6667
2016	F	TH	11	5	1	5	400
2016	F	TH	11	6	2	3	50
2016	F	TH	11	7	2	3	50
2016	F	TH	11	8	1	2	100
2016	F	TH	11	9	2	4	100
2016	F	TH	11	10	2	4	100
2016	F	TH	12	1	3	5	66.6667
2016	F	TH	12	2	3	5	66.6667
2016	F	TH	12	3	3	5	66.6667
2016	F	TH	12	4	2	5	150
2016	F	TH	12	5	1	5	400
2016	F	TH	12	6	1	5	400
2016	F	TH	12	7	1	5	400
2016	F	TH	12	8	1	5	400
2016	F	TH	12	9	1	5	400
2016	F	TH	12	10	1	5	400
2016	F	TH	13	1	3	5	66.6667
2016	F	TH	13	2	1	4	300
2016	F	TH	13	3	3	5	66.6667
2016	F	TH	13	4	1	5	400
2016	F	TH	13	5	1	5	400
2016	F	TH	13	6	1	4	300
2016	F	TH	13	7	1	4	300
2016	F	TH	13	8	1	5	400
2016	F	TH	13	9	1	5	400
2016	F	TH	13	10	1	4	300
2016	F	TH	14	1	2	5	150
2016	F	TH	14	2	3	5	66.6667
2016	F	TH	14	3	3	4	33.3333
2016	F	TH	14	4	3	5	66.6667
2016	F	TH	14	5	3	5	66.6667
2016	F	TH	14	6	2	4	100
2016	F	TH	14	7	1	4	300
2016	F	TH	14	8	2	4	100
2016	F	TH	14	9	2	4	100
2016	F	TH	14	10	1	5	400
2016	F	TH	15	1	3	4	33.3333
2016	F	TH	15	2	1	5	400
2016	F	TH	15	3	1	4	300
2016	F	TH	15	4	1	5	400
2016	F	TH	15	5	1	4	300
2016	F	TH	15	6	1	3	200
2016	F	TH	15	7	1	4	300
2016	F	TH	15	8	1	4	300
2016	F	TH	15	9	1	4	300
2016	F	TH	15	10	1	5	400
2016	F	TH	16	1	3	4	33.3333
2016	F	TH	16	2	2	4	100
2016	F	TH	16	3	2	4	100
2016	F	TH	16	4	2	4	100
2016	F	TH	16	5	3	5	66.6667
2016	F	TH	16	6	2	4	100
2016	F	TH	16	7	1	4	300
2016	F	TH	16	8	1	4	300
2016	F	TH	16	9	2	4	100
2016	F	TH	16	10	2	4	100
2016	F	TH	17	1	3	4	33.3333
2016	F	TH	17	2	1	2	100
2016	F	TH	17	3	1	2	100
2016	F	TH	17	4	1	2	100
2016	F	TH	17	5	1	4	300
2016	F	TH	17	6	2	4	100
2016	F	TH	17	7	1	4	300
2016	F	TH	17	8	1	4	300
2016	F	TH	17	9	1	4	300
2016	F	TH	17	10	1	4	300
2016	F	TH	18	1	2	4	100
2016	F	TH	18	2	1	4	300
2016	F	TH	18	3	1	5	400
2016	F	TH	18	4	1	4	300
2016	F	TH	18	5	1	5	400
2016	F	TH	18	6	1	4	300
2016	F	TH	18	7	2	4	100
2016	F	TH	18	8	2	3	50
2016	F	TH	18	9	1	4	300
2016	F	TH	18	10	1	3	200
2016	F	TH	19	1	2	4	100
2016	F	TH	19	2	1	4	300
2016	F	TH	19	3	3	3	0
2016	F	TH	19	4	3	3	0
2016	F	TH	19	5	2	3	50
2016	F	TH	19	6	2	3	50
2016	F	TH	19	7	1	3	200
2016	F	TH	19	8	1	3	200
2016	F	TH	19	9	1	4	300
2016	F	TH	19	10	1	3	200
2016	F	TH	20	1	2	5	150
2016	F	TH	20	2	1	3	200
2016	F	TH	20	3	3	4	33.3333
2016	F	TH	20	4	2	4	100
2016	F	TH	20	5	3	5	66.6667
2016	F	TH	20	6	2	3	50
2016	F	TH	20	7	4	5	25
2016	F	TH	20	8	1	3	200
2016	F	TH	20	9	4	5	25
2016	F	TH	20	10	1	3	200
