# Supplementary material
Source: MDPI journal article supplement (https://www.mdpi.com/2227-7102/7/1/18)
Supplement: s2 [file s2]

## Sheet: Sheet1
	Year	Semester	Day	Others' mean	Oncampus
	2012	F	W	10	7
	2012	F	W	9	7
	2012	F	W	9	9		Fall	Other plant quizes	On-campus
	2012	F	W	7	5			7.29	8.11
	2012	F	W	10	10		SE	0.13	0.13
	2012	F	W	10	9
	2012	F	W	9	9		Spring	6.24	7.4
	2012	F	W	9	9		SE	0.19	0.21
	2012	F	W	7.5	9
	2012	F	W	8.5	10
	2012	F	W	10	9						Other plant quizes	On-campus quiz
	2012	F	W	10	9					Fall	7.29	8.11
	2012	F	W	6	9					Spring	6.24	7.4
	2012	F	W	9.5	7
	2012	F	W	9.5	9
	2012	F	W	8.5	9
	2012	F	W	8	7
	2012	F	W	6	9
	2012	F	W	8	8
	2012	F	W	9	10
	2011	F	W	8	10
	2011	F	W	7	10
	2011	F	W	6	7
	2011	F	W	7.5	7
	2011	F	W	7.5	9
	2011	F	W	6	7
	2011	F	W	9	10
	2011	F	W	9	9
	2011	F	W	5.5	8
	2011	F	W	7	8
	2011	F	W	10	10
	2011	F	W	8	6
	2011	F	W	4.5	7
	2011	F	W	4	7
	2011	F	W	9	9
	2011	F	W	9	9
	2015	F	F	4	10
	2015	F	F	7.5	7
	2015	F	F	9	10
	2015	F	F	4	5
	2015	F	F	6	6
	2015	F	F	7.5	7
	2015	F	F	4.5	4
	2015	F	F	8	7
	2015	F	F	7.5	10
	2015	F	F	6	8
	2015	F	F	8.5	9
	2015	F	F	8.5	10
	2015	F	F	6	9
	2015	F	F	7	7
	2015	F	F	5.5	9
	2015	F	F	3.5	4
	2015	F	F	8	6
	2015	F	F	7.5	9
	2015	F	TH	7.5	9
	2015	F	TH	9	10
	2015	F	TH	2.5	4
	2015	F	TH	8	8
	2015	F	TH	6.5	6
	2015	F	TH	7	6
	2015	F	TH	8	8
	2015	F	TH	4.5	5
	2015	F	TH	8	10
	2015	F	TH	7	10
	2015	F	TH	5	8
	2015	F	TH	8.5	9
	2015	F	TH	6	7
	2015	F	TH	8.5	8
	2015	F	TH	8.5	8
	2015	F	TH	5	9
	2015	F	TH	7	9
	2015	F	TH	8.5	10
	2015	F	TH	6.5	7
	2015	F	TH	7.5	7
	2015	F	TH	4.5	7
	2015	F	TH	7	6
	2014	F	F	4.5	7
	2014	F	F	6.5	8
	2014	F	F	8	7
	2014	F	F	8	9
	2014	F	F	7	10
	2014	F	F	5	10
	2014	F	F	7.5	10
	2014	F	F	7.5	7
	2014	F	F	5.5	6
	2014	F	F	6	8
	2014	F	F	8.5	8
	2014	F	F	10	10
	2014	F	F	6.5	8
	2014	F	F	8.5	10
	2014	F	F	6.5	8
	2010	F	M	5.5	5
	2010	F	M	4.5	6
	2010	F	M	7.5	9
	2010	F	M	6.5	7
	2010	F	M	9.5	10
	2010	F	M	9	8
	2010	F	M	6	9
	2010	F	M	9	10
	2010	F	M	7	8
	2010	F	M	6	9
	2010	F	M	6	9
	2010	F	M	7	7
	2010	F	M	5.5	7
	2010	F	M	9.5	10
	2010	F	M	8.5	8
	2010	F	M	8.5	10
	2010	F	M	8.5	10
	2010	F	M	5	8
	2010	F	M	6	8
	2016	F	TH	9.5	10
	2016	F	TH	7	9
	2016	F	TH	9.5	9
	2016	F	TH	6.5	8
	2016	F	TH	7.5	8.5
	2016	F	TH	8.5	9
	2016	F	TH	7.5	7
	2016	F	TH	7.5	7
	2016	F	TH	10	10
	2016	F	TH	4	4
	2016	F	TH	6	9
	2016	F	TH	8	8
	2016	F	TH	5	7
	2016	F	TH	10	10
	2016	F	TH	9	10
	2016	F	TH	7	10
	2016	F	TH	3.5	3
	2016	F	TH	4	6
	2016	F	TH	9	10
	2016	F	TH	8	9
	2011	F	M	4	7
	2011	F	M	9	9
	2011	F	M	9	9
	2011	F	M	4	10
	2011	F	M	6.5	7
	2011	F	M	9	10
	2011	F	M	6	8
	2011	F	M	4	5
	2011	F	M	8.5	8
	2011	F	M	6	6
	2011	F	M	7.5	9
	2011	F	M	4.5	4
	2011	F	M	7.5	8
	2011	F	M	7.5	10
	2016	F	T	9.25	10
	2016	F	T	7.75	9
	2016	F	T	8	10
	2016	F	T	6.25	8
	2016	F	T	7	5
	2016	F	T	9.75	9
	2016	F	T	8.5	7
	2016	F	T	8.5	7
	2016	F	T	10	10
	2016	F	T	6.25	7
	2016	F	T	6.5	9
	2016	F	T	7.75	8
	2016	F	T	7	5
	2016	F	T	10	10
	2016	F	T	9.25	10
	2016	F	T	7.75	10
	2016	F	T	4.5	3
	2016	F	T	5.25	6
	2016	F	T	10	10
	2016	F	T	7.5	9
	2012	S	W	8	9
	2012	S	W	5.5	6
	2012	S	W	8	9
	2012	S	W	8.5	8
	2012	S	W	8	6
	2012	S	W	2	4
	2012	S	W	8	6
	2012	S	W	9	9
	2012	S	W	4.5	6
	2012	S	W	6	6
	2012	S	W	5.5	8
	2012	S	W	8.5	10
	2012	S	W	6.5	7
	2012	S	W	3	4
	2012	S	W	8	8
	2012	S	W	4.5	6
	2012	S	W	5	4
	2012	S	W	7.5	7
	2012	S	W	8	8
	2012	S	W	6	5
	2012	S	W	4.5	7
	2012	S	W	6	7
	2012	S	W	8.5	8
	2013	S	M	6.5	8
	2013	S	M	5.5	9
	2013	S	M	6	7
	2013	S	M	7.5	9
	2013	S	M	9	9
	2013	S	M	3.5	6
	2013	S	M	6	7
	2013	S	M	7.5	9
	2013	S	M	5.5	8
	2013	S	M	7.5	6
	2013	S	M	2	6
	2013	S	M	2.5	6
	2013	S	M	7	6
	2013	S	M	4	8
	2013	S	M	6	9
	2013	S	M	6	7
	2013	S	M	5.5	6
	2013	S	M	6	9
	2013	S	M	5	7
	2013	S	M	6.5	8
	2013	S	M	8	3
	2015	S	M	4	3
	2015	S	M	4	3
	2015	S	M	6.5	10
	2015	S	M	4.5	5
	2015	S	M	6.5	6
	2015	S	M	5	7
	2015	S	M	5	9
	2015	S	M	6	9
	2015	S	M	6	7
	2015	S	M	7	9
	2015	S	M	6.5	8
	2015	S	M	5.5	10
	2015	S	M	7.5	8
	2015	S	M	6	6
	2015	S	M	8	10
	2015	S	M	5.5	9
	2015	S	M	6	7
	2015	S	M	7.5	8
	2015	S	M	7.5	10
	2015	S	M	7	10
	2015	S	M	7	8
	2015	S	M	7.5	9
	2015	S	M	8.5	10
	2015	S	M	7	9
	2015	S	M	7	8
	2015	S	M	6.5	9
