# Supplementary material
Source: MDPI journal article supplement (https://www.mdpi.com/2227-7102/7/1/18)
Supplement: s3 [file s3]

# A typical quiz used for assessment of student performance (actual knowledge gain) after the on-campus tour exercise.

# Name: BIODIVERSITY LAB – Quiz – On-campus tour

**Choose the BEST answer by writing the letter of the answer on the line before the question number.**

____1. This evergreen coniferous tree’s leaves are used as food by wildlife in the Northern U.S. forests during winter?

A. *Quercus rubra* B. *Cycus revoluta*  C. *Liquidamber styraciflua*

D. Arborvitae E. Bald Cypress

____2. The purple-flowered tree/bush that is popular in neighborhood landscapes of New Orleans (or of Louisiana) is __________.

A. Sweet gum tree B. Cycad C. Crape myrtle D. Arborvitae

E. Bald Cypress

____3. A deciduous *Coniferophyte* that we visited on campus premises was _________.

A. Cycad B. Bald Cypress C. Pear D. Pine E. Arborvitae

____4. The poisonous _________ tree is a/an _________.

A. Oleander, dioecious *Gymnosperm* B. Cycad, deciduous *Gymnosperm*

C. Sweet gum, deciduous *Anthophyte* D. Oleander, evergreen *Gymnosperm*

E. Cycad, dioecious *Gymnosperm*

____5. State trees of Louisiana and Georgia are ___________ and ____________, respectively.

A. Bald Cyprus, Magnolia B. Live oak, Bald Cyprus C. Magnolia, Live Oak

D. Bald Cyprus, Cycad E. Bald Cyprus, Live Oak

____6. What is the phylum of calary pear?

A. *Magnoliophyta* (*Anthophyta*) B. *Coniferophyta* (*Pinophyta*)

C. *Monocoteledonae (Liliopsida)* D. *Polipodiophyta*

E. *Eudicoteledonae (Magnoliopsida)*

____7. What is the phylum of herbaceous plants we saw on-campus?

A. *Magnoliophyta* (*Anthophyta*) B. *Coniferophyta* (*Pinophyta*)

C. *Monocoteledonae (Liliopsida)* D. *Ginkgophyta*

E. *Eudicoteledonae (Magnoliopsida)*

____8. Epiphytes such as _________ exemplify _________ symbiotic relationships in ecosystems.

A. Oak, parasitic B. Resurrection fern, mutualistic

C. Bald Cypress, commensalistic D. Resurrection fern, commensalistic

E. Spanish moss, parasitic

____9. Lichens we saw on live oak tree barks were a _______ relationship between species belonging to _______.

A. Mutualistic, the same kingdom B. Parasitic, fungi C. Symbiotic, algae

D. Commensalistic, algae and fungi E. Mutualistic, algae and fungi

____10. What is the botanical name of pear tree that produces pear fruits we eat?

A. *Quercus rubra* B. *Cycas calleriana* C. *Liquidamber styraciflua*

D. *Pyrus communis* E. *Morus alba*
